# Supplementary material
Source: PubMed Central journal article supplement (PMC3391122)
Supplement: supp_M111.332502_supp_info_revised.pdf [file supp_M111.332502_supp_info_revised.pdf]

## SUPPLEMENTAL INFORMATION

### Supplemental Contents:

#### Supplemental Materials and Methods

**Supplemental Table 1: Sequence information for the clustering of other GATC sites around known unmethylated GATC sites**

**Supplemental Figure 1: Histogram summarizing the data from Supplemental Table 1**

**Supplemental Figure 2: Validation of DpnI assay**

**Supplemental Figure 3: Modeling of different ratios of  $k_1$  and  $k_2$  (From Figure 3D, primary manuscript) to explore the extent of intrasite processivity**

**Supplemental Figure 4: Sample PAGE gels**

### SUPPLEMENTAL MATERIALS AND METHODS

**DpnI digestion control experiment:** Single stranded DNA and its reverse complement were ordered and annealed (5'-ATCGTGGACTTCTACTTGGATGGAGAAAAG**GATCGAC**ACGTATTCCAGGAATTCACGTTAC-3') generating substrate H. The DNA was then subjected to M.Taq methylation. The 50 uL reaction contained 210 nM DNA, 100 µg/mL BSA, 30uM SAM, 5uL NEB Buffer 4, and 30 units of M.Taq (NEB); it was incubated for 3 hours at 65 degrees. The reaction was then subjected to a phenol chloroform extraction and then an ethanol precipitation, making substrate H<sub>hm</sub>. M.Taq methylates adenines in 5'-TCGA-3' sequences (underlined), creating a hemimethylated GATC site (bold). To show that the substrate was completely hemimethylated, the DNA was subjected to DpnII (NEB) digestion. The hemimethylated DNA was then subjected to Dam methylation under single turnover reaction conditions (see primary manuscript) for several hours to insure complete methylation, making substrate H<sub>dm</sub>. The H<sub>hm</sub> control lane in Supplemental Figure 2B was incubated with the same single turnover conditions as H<sub>dm</sub>, but no AdoMet was added. 2.5µL of each reaction was added into 14.8 µL of water. 2 µL of NEB Buffer 4 was then added. Then 0.7 µL (14 units) of DpnI (NEB) was added and the reaction was incubated at 37 degrees for 10 minutes. The reactions were heat killed and slow cooled to room temperature before PAGE (see primary manuscript).

### SUPPLEMENTAL TABLE LEGENDS

Supplemental Table 1: A List of known heritably unmethylated GATC sites (underlined) and the distance to their closest adjacent GATC site. Most (19 out of 26) of these sites have been implicated to be involved in gene regulation because they overlap with binding sites for known regulatory proteins. Examples where the spacing between GATC sites is greater than 200 base pairs are not included. <sup>a</sup> sequence from E. coli k-12 chromosome MG155. nc 000913.2; “number” represents list from table in (1).

## SUPPLEMENTAL FIGURE LEGENDS

Supplemental Figure 1: Histogram of variable clustering of GATC sites (compiled from Supplemental Table 1).

Supplemental Figure 2: Validation of the DpnI cutting assay. (A) Substrate H is methylated by M.Taq to create substrate Hhm (hemimethylated GATC site on DNA). Lane 1 is substrate Hhm (hemi methylated 60mer) subjected to DpnII digestion. DpnII cuts unmethylated GATC sites. Lane 2 is substrate H subjected to DpnII digestion (digestion fragments are both ~30 base pairs and are shown overlaid on the gel). Protection from cutting shows that substrate Hhm is completely hemi methylated. (B) Substrate Hhm and substrate Hdm (completely methylated GATC site on DNA) are subjected to DpnI digestion. Lane 1 shows that substrate Hhm is uncut while substrate Hdm is significantly cut.

Supplemental Figure 3: Traces for different ratios of  $k_1:k_2$  used to model the data from Figure 3D. The black line is the tritium data; the black dots are  $k_2=1000k_1$  and  $k_2=100k_1$  (both traces are identical); the grey dots are  $k_2=10k_1$ ; the grey diamonds are  $k_2=.1k_1$ ; the grey dashed line is sequential methylation,  $k_1 \sim k_2$ . Notably, only a small ratio of rate constants separates a sequential from an intrasite processive event. To address what a truly sequential process might be, the scenario  $k_2=.1k_1$  was modeled, showing a large decrease in activity in comparison to the tritium data and the  $k_1 \sim k_2$  scenario.

Supplemental Figure 4: (A) Representative gel for the reaction time course for substrate 1B. The DpnI data is derived from the accumulation of the 115mer base pair fragment. The final lane represents the plateau level from the complete methylation of the substrate. (B) Representative gel for substrate 1C.

**SUPPLEMENTAL TABLES**

**Table 1**

| number;<br>genome location <sup>a</sup> | distance<br>between sites | sequence                                                                                                                                                                                                                                                    |
|-----------------------------------------|---------------------------|-------------------------------------------------------------------------------------------------------------------------------------------------------------------------------------------------------------------------------------------------------------|
| 2; 141280-141467                        | 168                       | TAAACATGTGT <b>GATC</b> GTGCATCACAATTCGAGCTTTATTAACAGATTCGCGGAATGAATAGTTTTCTGGTATACTGCGTGCTTTGCGCTTTGTTGCGGTGCCAAAACCTGCCCGTGCGAAGTGATTTGT<br>TTTTAAATCATATGGTTAGAGATATGAAACATACTGTAGAAGTAAT <b>GATC</b> CCCCGAAGCGG                                        |
| 3; 344331-344419                        | 70                        | GATATTTTGTGT <b>GATC</b> GGCGACACTTCGCTTAAAAAGCACCAGTAGTGGTTTCGCAGCCATG<br>CGGTGTATAAAAAAT <b>GATC</b> TCATGC                                                                                                                                               |
| 4; 621442-621662                        | 197                       | TCGTTAT <b>GATC</b> TTATTTGGATATGTTAGCATGTGCAGCCTAAGAATAGGTATTTAAAAATTT<br>GATGGCAAGGCATTGTAATGAATAAACAAATCCTGGCTGCTTAACCTCAGCCTGTTGAAAACGCA<br>CCCGCGCTTTCGCGCAGTATTCCTCGCTCGTTTCATCTCAATTGTGTCTCTGGGTTTGTCTCGGC<br>GTCGCGGTGCCGGTGCA <b>GATC</b> CAGATGAT |
| 5; 765190-765268                        | 55                        | GTGAAAT <b>GATC</b> CACATAATGGTATTGTTTTATCGGGCACACTGGCGGACTATAAAAA <b>GATC</b> CA<br>AGTGAG <b>GATC</b> ATGAT                                                                                                                                               |
| 6; 1099413-1099492                      | 53                        | AATAAGTGT <b>GATC</b> TACGTCACTCATAACTGCAACGGATAATTTGTTGTTGCATAAAAATGTTGTG<br>TC <b>GATC</b> TCATTCATGG                                                                                                                                                     |
| 7; 1168208-1168301                      | 20                        | TGTATGT <b>GATC</b> CAGATCACATCTATCATTTAGTTAT <b>GATC</b> GTTAAGTAATTGCTTGCAGCGTC<br>ATTCACTGCATAAGGCCACTATTATGAAA                                                                                                                                          |
| 8; 1365999-1366177                      | 169                       | TTCAATCA <b>GATC</b> TTTATAAATCAAAAAGATAAAAAATGGCACGAAAATGTTATTAACAGTTCA<br>GCAGGACAATCCTGAACGCAGAAATCAAGAGGACAACATTATGGGTATTTTTTCTCGCTTTGCC<br>GACATCGTGAATGCCAACATCAACGCTCTGTTAGAGAAAAGCGGAA <b>GATC</b> CA                                               |
| 9; 1653141-1653271                      | 23                        | AACTTCAGCCTTTA <b>GATC</b> TTTCATGTTTCGATTCTTGCATCGCTTGCCTGATGCATGAAATC<br>TACGCAACTGAGCTACTACCATAAAGTATAAA <b>GATC</b> GAAAAAAGCCGGAGT <b>GATC</b> CAAAAAA<br>AGG                                                                                          |
| 10; 1859438-1859479                     | 23                        | AAAAACACAGATAAT <b>GATC</b> TGCGTTTTACAAC <b>TGATC</b> ACAAA                                                                                                                                                                                                |
| 12; 2069331-2069399                     | 22                        | AGAATAAAAC <b>GATC</b> AAATATCTATTTTAT <b>GATC</b> GTTTATAT <b>GATC</b> GATAAGCTAATAATAACC<br>TTTGT                                                                                                                                                         |
| 13; 2229690-2229814                     | 105                       | <b>TGATC</b> GCACCGTTCCTTTTCCCGATTATTCTGGCAGTAATGGGCTAAAATTTGCGATGCGTCGC<br>GCATTTTGTATGATGTTTACAGCGTTGCATAATTAATGAGATTC <b>GATC</b> CACATATAAAGC                                                                                                           |
| 14; 2599023-2599032                     | 2                         | CTCGT <b>GATC</b> AG <b>GATC</b> ACA                                                                                                                                                                                                                        |
| 16; 3490434-3490522                     | 22                        | GAC <b>GATC</b> ACTTTTTATTCCGT <b>GATC</b> AAAATCACCTCTTAAATGCAATTTAGCAACCGATTGCA<br>ATAAAACATTTAAAC <b>GATC</b> ACAAA                                                                                                                                      |
| 17; 3638634-3638751                     | 96                        | GTTACCT <b>GATC</b> AGCGTAAACACCTTATCTGGCCTACGGTCTGCGTACGCAATCAAAATCCCCAG<br>CCAATACAACATTTAACACCATCATATTTCCATCATTAGTGT <b>GATC</b> ATCTGGT                                                                                                                 |
| 18; 3740597-3740743                     | 50                        | AC <b>GATC</b> TCGACAGATAATTTATAACCAATTGATTTTATGTCTTTTGAATTCATCAATCAGAT<br>TGCCTTGTAAAAAGT <b>GATC</b> GATATATTGAAATCAAGTTTCGCATATTGAAATTTAAGCCAA<br>AAAAG <b>GATC</b> AAAAAAACA                                                                            |
| 19; 3769939-3770003                     | 39                        | AACATGCTGT <b>GATC</b> CACATCAGGTGAACGCCGTAAGAAAATATCTTGTGATTC <b>GATC</b> ACAAAAG<br>A                                                                                                                                                                     |
| 20; 3873223-3873339                     | 98                        | CCC <b>GATC</b> GATGCATAACCGCGCACTTTGTAGTACCAGCGTGATGACGTTGCGGTTTCCCGTGC<br>GTGTAATGTAGTACAACTTATATTGTTGTACTACAATTT <b>GATC</b> ACAAAAAG                                                                                                                    |
| 21; 4071646-4071805                     | 133                       | TGCTTGCTGTTTTT <b>GATC</b> GATATTGTAATTTATCGTCAAAAAATGACAGCCGTCATTTTTTA<br>ACAATTTGGTGAATTTAAATGAACGCATCCCAAAATGTTTAAGGAATGACCATGATTCGTGTT<br>GCTTGTGTAGGTATAACCGTGAT <b>GATC</b> GCAT                                                                      |
| 22; 4099532-4099618                     | 38                        | TTTTTGT <b>GATC</b> CAATTTCAAAATAAAAACAAT <b>GATC</b> CGATAAAAAATAAACAGCGTTTCAATTGA<br>TGTGGTTTT <b>GATC</b> ACTTTTTATTG                                                                                                                                    |
| 24; 4347090-4347259                     | 138                       | AGATTAATCT <b>GATC</b> TACCCATTTGTGGGTA AAAATACACATAATGCGGGTGACATAATAGTTAA<br>TTAACTTTTGTAGCGTTTTGAAATTA AAAACACCGTTCACTGAAGAGATATTAATTTTAGC<br>GATGATGGAGGATAATTTATTT <b>GATC</b> TGGCACAAGTTTTA                                                           |
| 25; 4537910-4538119                     | 59                        | ACCTGTTATACCA <b>GATC</b> AAAAATCACGCAATCCATACAAACAAAACAGATTTGCAATTCGTGTC<br>ACAAAATATGT <b>GATC</b> TTTTTCTAAGAGGAAGATGCCATGTGAAGCCAGACGAACACTTGCAGT<br>GGTCTTCAAAAATAAA <b>GATC</b> TTAGTTTAACTATTTGT                                                     |
| 26; 4537959-4538108                     | 65                        | TTATACCA <b>GATC</b> AAAAATCACGCAATCCATACAAACAAAACAGATTTGCAATTCGTGTCACAAA<br>ATATGT <b>GATC</b> TTTTTCTAAGAGGAAGATGCCATGTGAAGCCAGACGAACACTTGCAGTGGTCT<br>TCAAAAATAAA <b>GATC</b> TTAGTT                                                                     |

Supplemental Figure 1

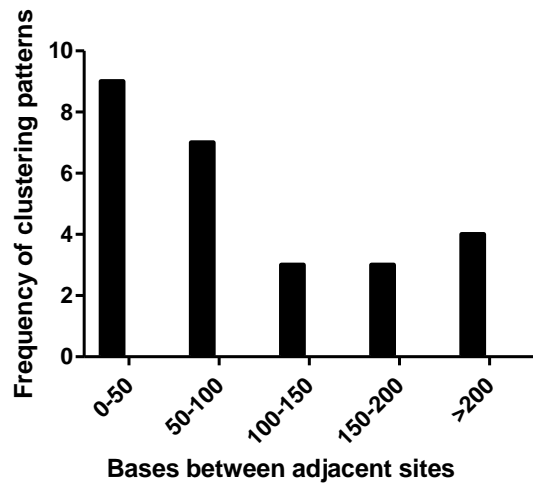

Supplemental Figure 2A:

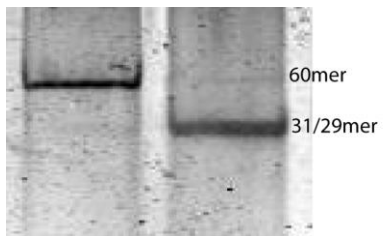

Supplemental Figure 2B:

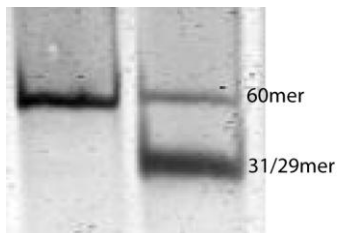

Supplemental Figure 3:

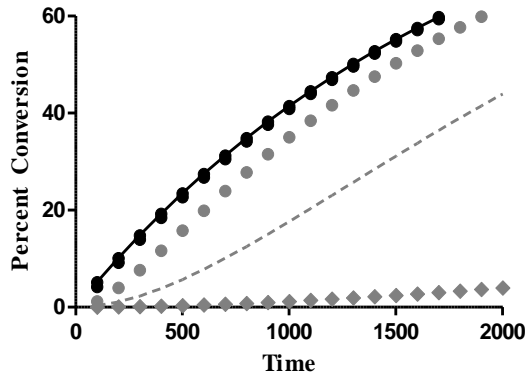

Supplemental Figure 4:

A

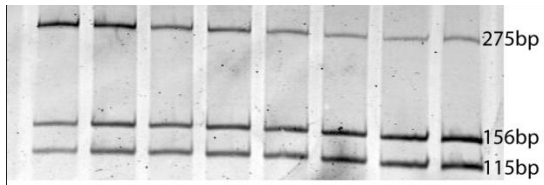

B

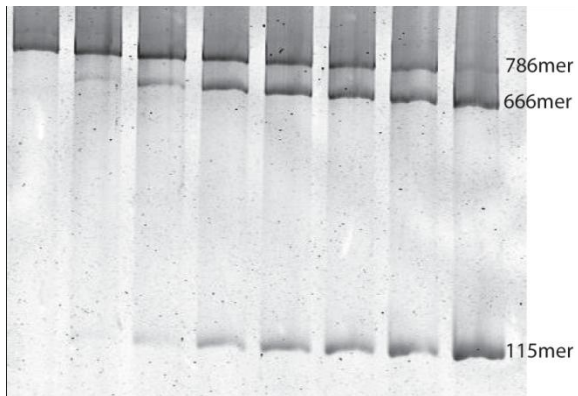

## REFERENCES

1. Casadesus, J., and Low, D. (2006) *Microbiol. Mol. Biol. Rev.* **70**(3): 830-856
